# Supplementary material for: GATA2 as a potential metastasis-driving gene in prostate cancer
Source: PubMed Central journal article supplement (PMC3964220; doi:10.18632/oncotarget.1296), 2014-01-12
Supplement: oncotarget-05-451-s001.pdf [file oncotarget-05-451-s001.pdf]

## Supplementary Fig. 1A

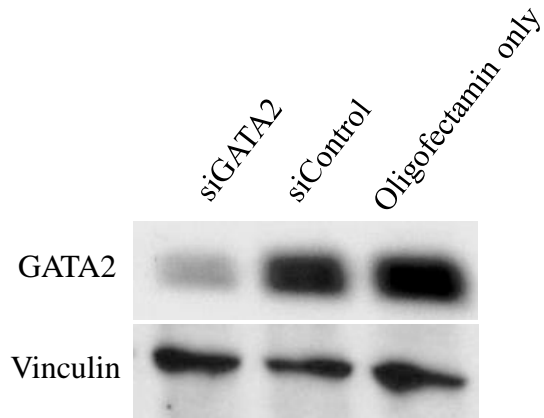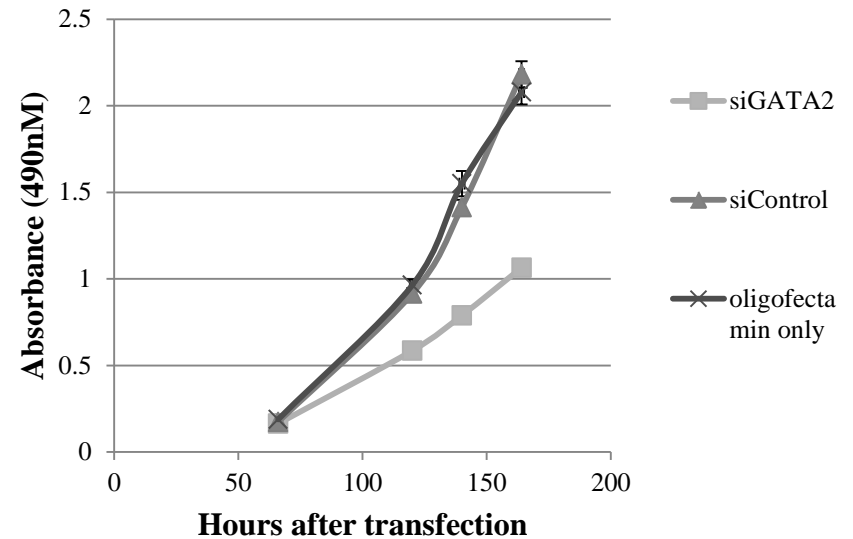

## Supplementary Fig. 1B

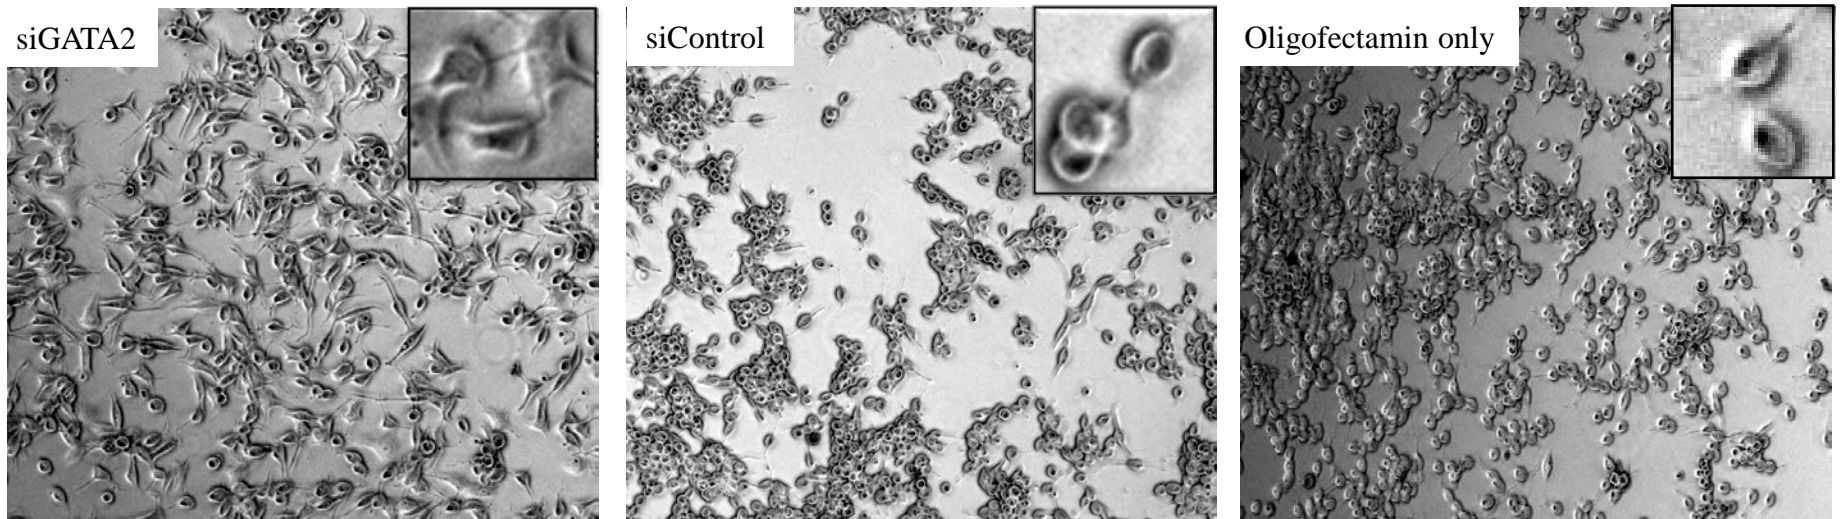

Supplementary Figure 1: A) *GATA2* silencing markedly reduced proliferation of C4-2 prostate cancer cells. B) *GATA2* silencing induced morphological changes in C4-2 prostate cancer cells. The normally rounded C4-2 cells became flat and spindle-like.
